# Supplementary material for: High-density P300 enhancers control cell state transitions
Source: Springer Nature journal article supplement (doi:10.1186/s12864-015-1905-6), 2015-11-06

# Figure S4

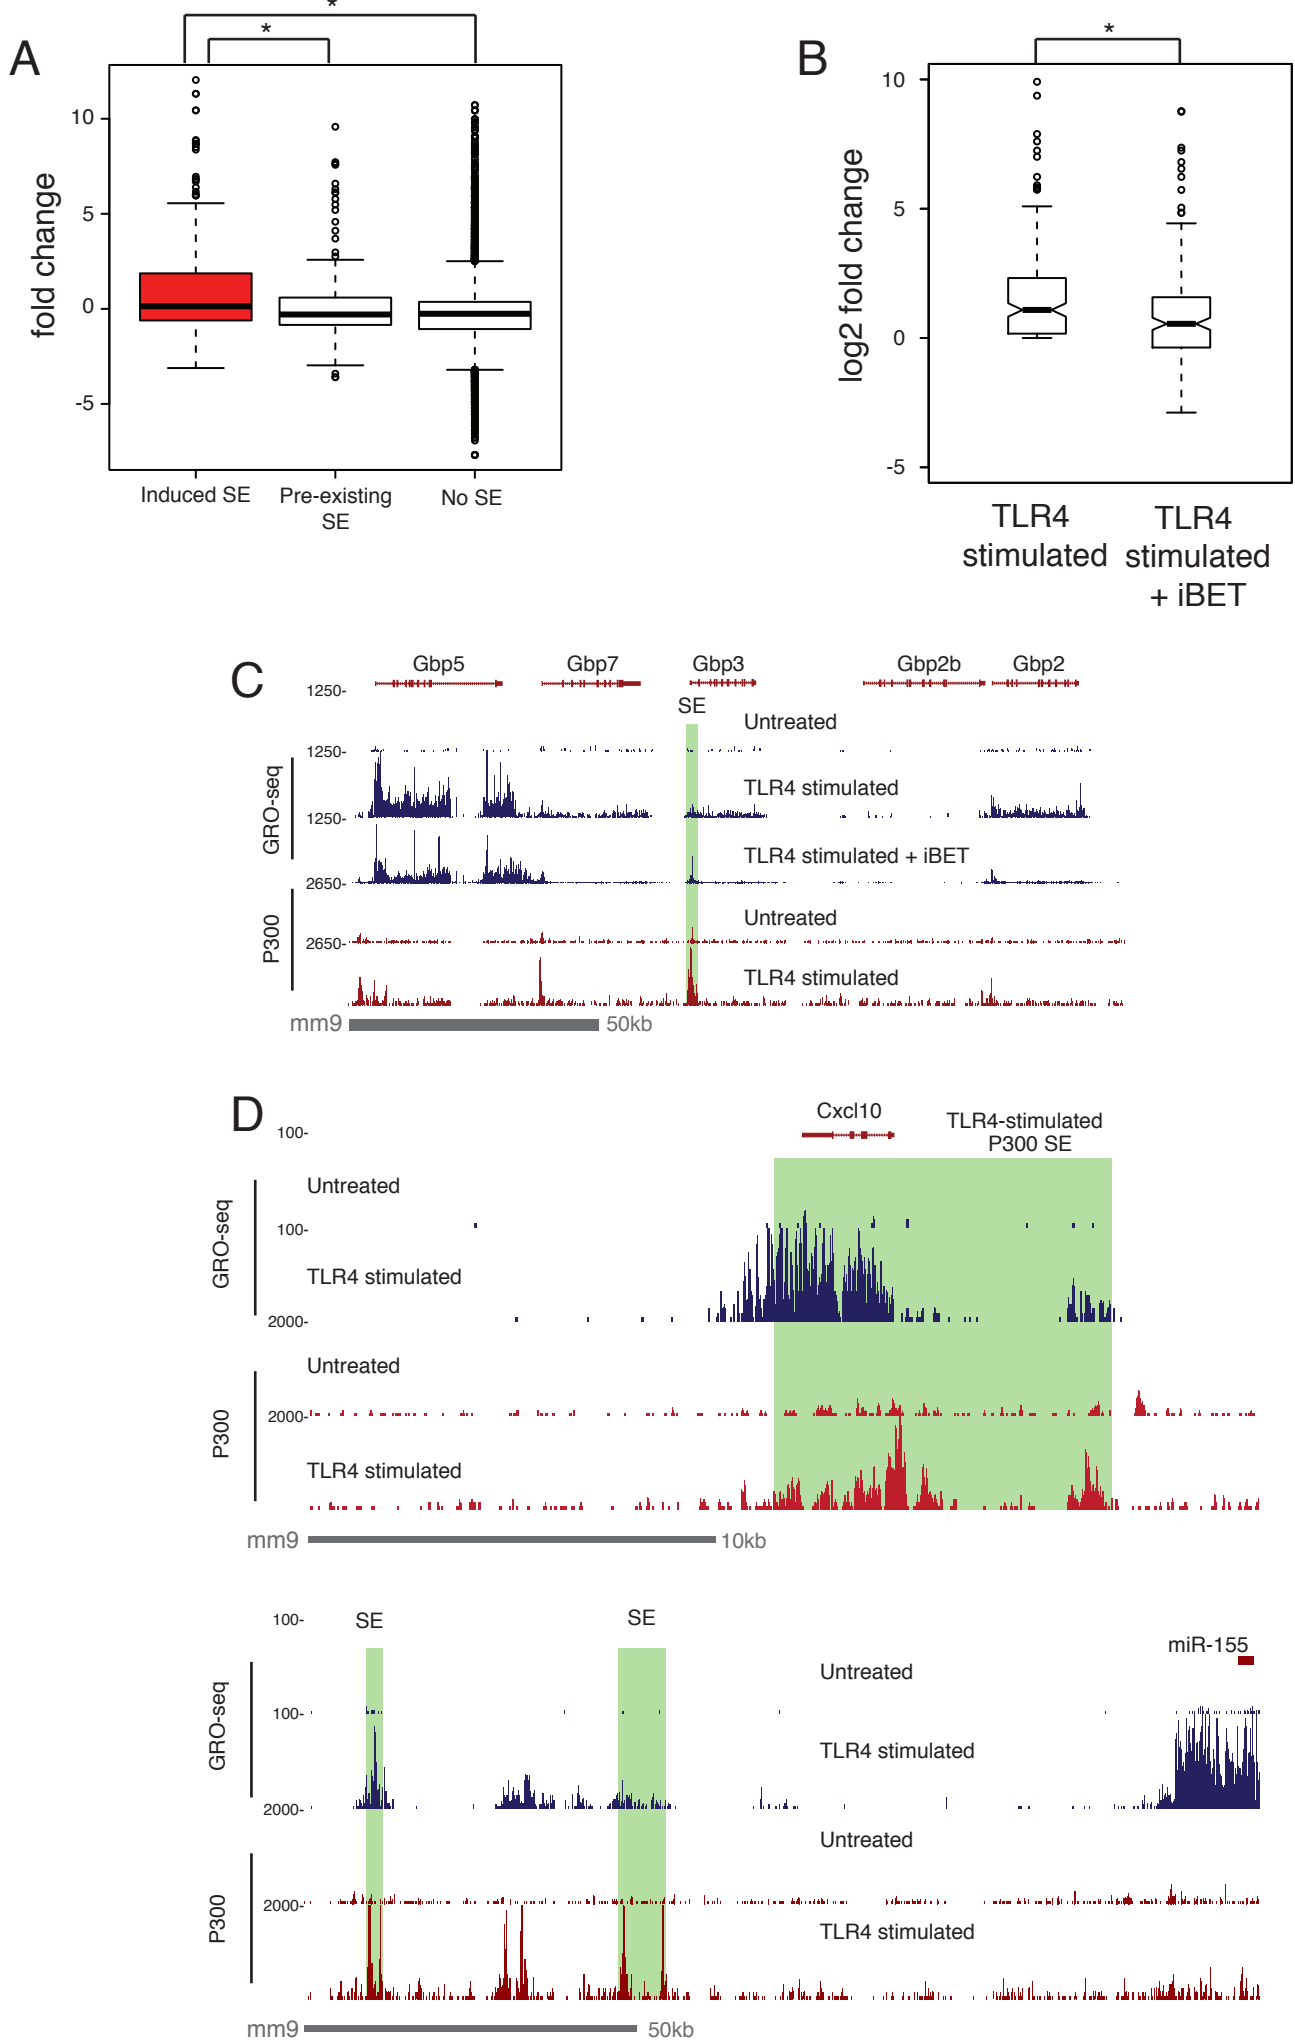

Supplement: 12864_2015_1905_MOESM9_ESM.pdf [file 12864_2015_1905_MOESM9_ESM.pdf]
